# Supplementary material for: Entwicklung des Cannabiskonsums vom Jugend- zum jungen Erwachsenenalter sowie Risiko- und Schutzfaktoren für einen problematischen Konsum – Ergebnisse einer Längsschnittstudie
Source: Springer Nature journal article supplement (doi:10.1007/s00103-025-04043-3), 2025-04-15
Supplement: MOESM1 [file 103_2025_4043_MOESM1_ESM.pdf]

## Onlinematerial

**Tabelle Z1.** Soziodemographische Daten der 18-Jahres-Follow-up-Stichprobe der jungen Erwachsenen mit vollständigen Daten zum Cannabiskonsum (FU18;  $N = 278$ ).

| Charakteristika                                      | <i>n (%)</i> |
|------------------------------------------------------|--------------|
| Biologisches Geschlecht                              |              |
| - weiblich                                           | 140 (50)     |
| - männlich                                           | 138 (50)     |
| Aktuelle Wohnsituation                               |              |
| - wohnhaft bei mind. einem Elternteil                | 86 (31)      |
| - bereits ausgezogen                                 | 192 (69)     |
| Aktuelle feste Partnerschaft                         |              |
| - nein                                               | 151 (54)     |
| - ja                                                 | 127 (46)     |
| Bereits eigene Kinder                                |              |
| - nein                                               | 269 (3)      |
| - ja                                                 | 9 (97)       |
| Schulabschluss junge Erwachsene (FU18)               |              |
| - ohne Abschluss/ Hauptschul- / Förderschulabschluss | 35 (9)       |
| - Mittlere Reife                                     | 44 (16)      |
| - Abitur / (Fach-)Hochschulreife                     | 209 (75)     |
| Bereits eine abgeschlossene Berufsausbildung         |              |
| - nein                                               | 89 (32)      |
| - ja                                                 | 189 (68)     |
| Aktuelle Tätigkeit                                   |              |
| - Studium an einer Universität, (Fach-)Hochschule    | 150 (54)     |
| - Ausbildung / Lehre                                 | 36 (13)      |
| - ausschließlich Berufstätigkeit                     | 55 (20)      |
| - arbeitssuchend                                     | 20 (7)       |
| - andere                                             | 17 (6)       |

**Tabelle Z2.** Soziodemographische Daten der Familien der Längsschnittstudie „Zukunft Familie“ zu Prä, FU10 und FU18.

|                                                    | Prä          |           |            |            | FU10         |           |            |            | FU18                  |           |            |            |
|----------------------------------------------------|--------------|-----------|------------|------------|--------------|-----------|------------|------------|-----------------------|-----------|------------|------------|
| Erhebungszeitraum (Jahr)                           | 2001 – 2004  |           |            |            | 2011 – 2013  |           |            |            | 2020 – 2022           |           |            |            |
| Charakteristika                                    | <i>n</i> (%) |           |            |            | <i>n</i> (%) |           |            |            | <i>n</i> (%)          |           |            |            |
| <i>N</i> (Familien)                                | 477 (100)    |           |            |            | 361 (76)     |           |            |            | 316 (67) <sup>1</sup> |           |            |            |
| Biologisches Geschlecht                            |              |           |            |            |              |           |            |            |                       |           |            |            |
| - weiblich                                         | 224 (47)     |           |            |            | 166 (46)     |           |            |            | 153 (48)              |           |            |            |
| - männlich                                         | 253 (53)     |           |            |            | 195 (54)     |           |            |            | 163 (52)              |           |            |            |
| Migrationshintergrund<br>(mind. eines Elternteils) |              |           |            |            |              |           |            |            |                       |           |            |            |
| - nein                                             | 375 (79)     |           |            |            | 291 (81)     |           |            |            | 257 (81)              |           |            |            |
| - ja                                               | 102 (21)     |           |            |            | 70 (19)      |           |            |            | 59 (19)               |           |            |            |
| Familienform                                       |              |           |            |            |              |           |            |            |                       |           |            |            |
| - Zweielternfamilie                                | 347 (73)     |           |            |            | 240 (66)     |           |            |            | 171 (54)              |           |            |            |
| - Einelternfamilie <sup>2</sup>                    | 129 (27)     |           |            |            | 110 (31)     |           |            |            | 143 (45)              |           |            |            |
| - fehlende Werte                                   | 1 (0)        |           |            |            | 11 (3)       |           |            |            | 2 (1)                 |           |            |            |
| Sozioökonomischer Status                           |              |           |            |            |              |           |            |            |                       |           |            |            |
| - niedrig                                          | 30 (6)       |           |            |            | 12 (3)       |           |            |            | 5 (2)                 |           |            |            |
| - mittel                                           | 197 (41)     |           |            |            | 138 (38)     |           |            |            | 130 (41)              |           |            |            |
| - hoch                                             | 230 (48)     |           |            |            | 196 (54)     |           |            |            | 151 (48)              |           |            |            |
| - fehlende Werte                                   | 20 (4)       |           |            |            | 15 (4)       |           |            |            | 30 (9)                |           |            |            |
| Triple P-Elterntaining                             |              |           |            |            |              |           |            |            |                       |           |            |            |
| - Interventionsgruppe                              | 383 (80)     |           |            |            | 282 (78)     |           |            |            | 246 (78)              |           |            |            |
| - Kontrollgruppe                                   | 94 (20)      |           |            |            | 79 (22)      |           |            |            | 70 (22)               |           |            |            |
|                                                    | <i>M</i>     | <i>SD</i> | <i>Min</i> | <i>Max</i> | <i>M</i>     | <i>SD</i> | <i>Min</i> | <i>Max</i> | <i>M</i>              | <i>SD</i> | <i>Min</i> | <i>Max</i> |
| Alter (Jahre)                                      | 4.2          | 1.0       | 2          | 7          | 14.1         | 1.2       | 11         | 17         | 22.3                  | 1.7       | 19         | 26         |

*Anmerkungen.* <sup>1</sup>*N* = 6 Familien wurden nicht erneut erhoben, da sie die Einschlusskriterien nicht erfüllten; <sup>2</sup>aufgrund elterlicher Trennung, da Eltern nie eine Beziehung hatten oder aufgrund des Tods eines Elternteils.

**Tabelle Z3.** Vergleich der verschiedenen Prävalenzraten für allgemeinen Cannabiskonsum sowie problematischen Konsum zwischen männlichen und weiblichen jungen Erwachsenen.

|                              | Gesamt     | Männer     | Frauen     | $\chi^2$ | $p$             | $\phi$ |
|------------------------------|------------|------------|------------|----------|-----------------|--------|
|                              | $n$ (%)    | $n$ (%)    | $n$ (%)    |          |                 |        |
| Gesamtstichprobe             | 278 (100)  | 138 (49.6) | 140 (50.4) |          |                 |        |
| Lebenszeitprävalenz          | 160 (57.6) | 90 (65.2)  | 70 (50.0)  | 6.59     | .005**          | .154   |
| 12-Monatsprävalenz           | 98 (35.3)  | 62 (44.9)  | 36 (25.7)  | 11.24    | $\leq .001$ *** | .201   |
| 30-Tage-Prävalenz            | 56 (20.1)  | 37 (26.8)  | 19 (13.6)  | 7.57     | .003**          | .165   |
| Problem. Konsum <sup>a</sup> | 34 (12.2)  | 26 (18.8)  | 8 (5.7)    | 11.16    | $\leq .001$ *** | .200   |

*Anmerkungen.* <sup>a</sup> Summenwert CUDIT-R  $\geq 10$ ;  $p$  (1-seitig); \*\*\*  $p \leq .001$ , \*\*  $p \leq .01$ , \*  $p \leq .05$ .
